# Supplementary material for: The contribution of energy systems during 15-second sprint exercise in athletes of different sports specializations
Source: PeerJ. 2024 Aug 23;12:e17863. doi: 10.7717/peerj.17863 (PMC11348913; doi:10.7717/peerj.17863)
Supplement: Supplemental Information 5 [file peerj-12-17863-s005.xlsx]

## Sheet: I-II EXAM
No.	Birth	Age	Group	Exam	Athlete	Gender	Weight [kg]	BF [%]	Height	Height at exam	Weight at Exam [kg]	Arms Lean Mass	Arm Right Lean Mass	Arm Left Lean Mass	Legs Lean Mass	Leg Right Lean Mass	Leg Left Lean Mass	Total Lean Mass	Arms Tissue Mass [g]	Arm Right Tissue Mass	Arm Left Tissue Mass	Legs Tissue Mass [g]	Leg Right Tissue Mass	Leg Left Tissue Mass	Total Tissue Mass [g]	Arms Fat-Free Mass	Arm Right Fat-Free Mass	Arm Left Fat-Free Mass	Legs Fat-Free Mass	Leg Right Fat-Free Mass	Leg Left Fat-Free Mass	Arms Total Mass	Arm Right Total Mass	Arm Left Total Mass	Legs Total Mass	Leg Right Total Mass	Leg Left Total Mass	Arms Tissue %Fat	Arm Right Tissue %Fat	Arm Left Tissue %Fat	Legs Tissue %Fat	Leg Right Tissue %Fat	Leg Left Tissue %Fat	Total Tissue %Fat	ALST	MM	RSMI	PP [W]	MP [W]
1	1997-06-10	25	MIX	1	01	M	72.6	14.1	169.5	169	72.6	8310	4 193	4 117	20948	10499	10449	59933	9463	4761	4702	24410	12350	12059	70030	8 747	4 412	4 335	22 210	11 132	11 078	9.7	5	4.6	30.7	15.7	15	19.4	20.3	18.4	24.2	24.7	23.6	25.8	29258	33.0626	10.244	883.2	751
2	2001-04-10	21	MIX	1	02	M	65.1	16	181.1	182	65.1	6091	3 180	2 912	18756	9223	9533	52405	7098	3673	3425	22518	11169	11349	62637	6 413	3 341	3 071	19 889	9 784	10 106	9.8	5	4.8	26.2	13.2	13	11.7	12.5	11	15.2	16	14.4	13	24847	28.0783	7.50121	715.6	642.1
3	1994-06-05	28	MIX	1	03	M	71.2	25	178.9	178.9	71.2	6219	3 123	3 096	17740	8941	8800	50927	7785	3971	3814	24094	12157	11937	67953	6 646	3 340	3 306	19 217	9 683	9 534	10.2	4.9	5.3	26.7	13.6	13.1	11.5	12.6	10.4	16.1	16.2	16	13.9	23959	27.0747	7.48597	707.6	610.2
4	1991-03-29	31	MIX	1	04	M	88.7	24	182.5	182.2	88.7	8170	4 300	3 870	23156	11635	11521	63537	10239	5444	4794	29156	14687	14469	84146	8 700	4 580	4 120	24 839	12 508	12 331	7.6	3.7	3.9	23.8	12	11.9	13.5	13.9	13.1	16.5	16	17	14.8	31326	35.3993	9.43644	1195.5	774.9
5	2002-05-09	20	MIX	1	05	M	75	13.5	183.7	183.1	75	8253	4 265	3 988	21164	10869	10295	61425	9384	4896	4488	25017	12829	12189	71318	8 797	4 548	4 250	22 651	11 616	11 035	6.2	3.1	3	19.5	9.9	9.6	15.5	15.4	15.7	17	17.6	16.4	14.4	29417	33.2424	8.77449	895.5	763.2
6	2002-01-21	21	MIX	1	06	M	70.7	11.8	181.5	181.4	70.6	7575	3 939	3 636	20142	9781	10361	59631	8629	4515	4114	22910	11134	11776	67597	8 060	4 192	3 868	21 610	10 510	11 099	10	5.2	4.8	28.2	14.3	13.9	17.7	18.9	16.3	20.5	21.1	19.8	20.5	27717	31.3214	8.42309	827.2	716.1
7	2002-12-23	20	MIX	1	07	M	65.6	11.3	171.6	171.2	65.6	7232	3 723	3 509	18964	9497	9468	55458	8237	4268	3970	21641	10904	10737	62919	7 605	3 914	3 691	20 135	10 080	10 055	7.6	4.1	3.5	21.6	10.9	10.6	14.2	14.9	13.3	12.2	12.5	12	13.1	26196	29.6027	8.93773	731.6	669.4
8	2002-04-04	20	MIX	1	09	M	62.4	15.6	187	185.6	62.4	5703	2 763	2 940	18493	9278	9216	49763	6747	3313	3434	22400	11214	11187	58958	6 097	2 959	3 137	19 892	9 985	9 908	9.1	4.7	4.3	25.7	12.2	13.5	11.8	12.3	11.3	12.5	11.4	13.5	12.6	24196	27.3427	7.02405	703.5	624.6
9	1994-12-02	28	MIX	1	10	M	73.7	23.8	170.4	169.7	73.7	6602	3 453	3 148	18231	9087	9144	52502	8564	4437	4127	23504	11719	11786	68900	7 006	3 660	3 346	19 326	9 625	9 701	10.8	5.5	5.3	29.6	14.6	15	13.1	13	13.2	16.8	17.1	16.5	15.2	24833	28.0623	8.62314	838.2	719
10	2002-10-15	20	MIX	1	11	M	79.4	15.3	184	184	79.4	8340	4 241	4 098	23512	11612	11900	64317	9669	4926	4744	28479	14094	14385	75933	8 842	4 499	4 343	25 083	12 403	12 680	9.8	5.1	4.7	29.9	14.7	15.2	14.2	12.8	15.6	13.6	13.2	13.9	15.2	31852	35.9939	9.40808	952.9	815.9
11	2001-02-07	22	MIX	1	12	M	82.6	21.1	185.5	184.9	82.6	8006	4 129	3 876	21351	10520	10832	62180	9785	5016	4769	28343	13890	14453	78853	8 521	4 394	4 127	22 944	11 330	11 614	8.7	4.5	4.2	24.8	12.2	12.6	18.4	17.7	19.2	21.6	20.7	22.5	19.9	29357	33.1745	8.58693	783.9	706.4
12	2000-03-11	22	MIX	1	13	M	70.6	11.9	186.5	186.5	70.6	6175	3 011	3 163	22139	10991	11148	59209	7147	3500	3647	25023	12458	12565	67210	6 591	3 218	3 373	23 655	11 751	11 903	10.9	5.7	5.2	31.9	16.3	15.7	17.9	18.5	17.2	18.5	17.5	19.6	21.7	28314	31.996	8.14036	772.2	679.5
13	1995-07-23	27	MIX	1	14	M	70.5	21.2	184.9	184.8	70.5	6515	3 408	3 106	18237	8980	9257	52644	7947	4095	3852	23336	11538	11799	66816	6 949	3 627	3 322	19 619	9 674	9 945	10.1	5.2	5	24.4	12.3	12	10.1	9.7	10.5	11.7	11.1	12.2	11	24752	27.9708	7.2478	726.9	639.5
14	1993-07-12	29	MIX	1	15	M	83.6	21.5	180.8	179.8	83.6	8834	4 417	4 417	21998	10850	11148	62344	10645	5322	5322	27784	13678	14106	79444	9 378	4 689	4 689	23 433	11 556	11 877	9.9	5	4.9	25.7	13	12.7	12.2	11.9	12.4	14.2	15	13.4	14.4	30832	34.8412	9.53723	943.5	837.5
15	2001-06-09	21	MIX	1	17	M	79.2	11.8	186.3	186.4	79.2	8694	4 414	4 280	24881	12425	12456	66193	9545	4859	4686	28286	14138	14148	75075	9 207	4 675	4 532	26 466	13 221	13 245	8.3	4.1	4.2	22.9	11.5	11.4	12.1	11.3	12.9	12.6	12.2	13	12.3	33575	37.9409	9.66327	997.7	847.6
16	1997-11-19	25	MIX	1	19	M	76.2	19.6	179.1	179.1	76.2	7442	3 721	3 721	21029	10716	10313	58667	8911	4455	4455	26201	13486	12714	72936	7 880	3 940	3 940	22 385	11 396	10 989	7.6	3.7	3.9	26.5	13.2	13.3	13.6	14	13.3	11.5	11.8	11.3	11.9	28471	32.1733	8.87588	870	749.6
17	1996-10-03	26	MIX	1	20	M	83	16.9	176.6	175.9	83	8189	4 209	3 980	24249	12008	12241	66419	9604	4896	4708	28830	14301	14529	79902	8 646	4 445	4 202	25 666	12 723	12 943	7	3.6	3.4	24.4	12.2	12.2	13.8	13.6	14	14.8	15.2	14.5	14.6	32438	36.656	10.4839	931.5	821.1
18	1985-03-30	37	MIX	1	21	M	76.6	16.1	177.2	176.6	76.6	7649	3 853	3 796	21105	10167	10937	60634	8894	4513	4380	24492	12070	12422	72299	8 101	4 085	4 016	22 493	10 869	11 625	10.2	5.3	5	31.2	15.7	15.5	10.4	11.2	9.5	10.5	11.4	9.6	10.9	28754	32.4929	9.2197	908.3	758.3
19	1998-12-21	24	MIX	1	23	M	83	26	175.5	175.5	83	7390	3 797	3 593	22091	11200	10890	58969	9165	4762	4404	29142	14880	14262	79475	7 903	4 064	3 839	23 665	11 996	11 669	9.3	4.7	4.6	25.9	12.8	13.1	14	14.6	13.3	13.8	15.8	11.9	16.1	29481	33.3146	9.57168	827	697.6
20	1997-06-16	25	S	1	01	M	86.8	12.2	184.7	184.7	86.8	9399	4 792	4 607	26436	13042	13394	73293	10505	5371	5134	30019	14890	15129	83430	9 889	5 040	4 849	27 781	13 727	14 054	11	5.6	5.4	31.4	15.6	15.8	10.5	10.8	10.3	11.9	12.4	11.5	12.2	35835	40.4946	10.5045	1101.4	928
21	2001-01-17	22	S	1	29	M	93.5	21.2	196.2	197.3	93.5	10088	5 118	4 970	25075	12721	12355	70186	12242	6217	6025	32973	16801	16172	89082	10 688	5 419	5 269	26 652	13 526	13 125	12.8	6.5	6.3	34.5	17.6	16.9	17.6	17.7	17.5	24	24.3	23.6	21.2	35163	39.7353	9.03299	986	849.1
22	2006-06-19	16	S	1	34	M	76.8	25.6	175.1	174.6	76.8	6891	3 501	3 390	18872	9505	9367	55508	9017	4567	4450	25652	13010	12641	74578	7 280	3 697	3 583	19 905	10 031	9 874	9.4	4.8	4.6	26.7	13.5	13.1	23.6	23.3	23.8	26.4	26.9	25.9	25.6	25763	29.1135	8.451	674.1	617.1
23	2005-10-01	17	S	1	32	M	60.9	22.5	174.7	172.1	60.9	5579	2 754	2 825	15888	7852	8035	45343	7316	3597	3719	21018	10440	10578	58510	5 967	2 948	3 019	16 984	8 392	8 592	7.7	3.8	3.9	22.1	11	11.1	23.7	23.4	24	24.4	24.8	24	22.5	21467	24.259	7.24786	905.4	785.1
24	2001-12-13	21	S	1	13	M	87.8	18.5	184.5	184.8	87.8	8716	4 301	4 415	25223	12135	13089	68336	10516	5161	5355	31087	15203	15884	83895	9 271	4 576	4 695	26 755	12 909	13 846	11.1	5.4	5.6	32.6	16	16.6	17.1	16.7	17.6	18.9	20.2	17.6	18.5	33939	38.3522	9.93791	1041.4	898.2
25	2001-01-16	22	EN	1	32	M	75.2	13.7	179.4	179.1	75.2	8051	4 183	3 868	20954	10350	10605	62840	9223	4750	4473	24969	12362	12607	72831	8 513	4 416	4 096	22 220	10 984	11 236	9.7	5	4.7	26.2	13	13.2	12.7	11.9	13.5	16.1	16.3	15.9	13.7	29005	32.7768	9.04236	905.4	785.1
26	2004-07-14	18	EN	1	33	M	63.5	12	180.8	180	63.5	6357	3 273	3 084	18273	9198	9076	53298	7223	3723	3500	21320	10899	10421	60965	6 760	3 480	3 280	19 446	9 801	9 645	7.6	3.9	3.7	22.5	11.5	11	12	12.1	11.9	14.3	15.6	12.9	12.6	24630	27.8331	7.60185	750.4	686
27	1991-12-18	31	EN	1	36	M	77.6	13.6	179.8	179.8	77.6	8379	4 395	3 984	22291	11276	11015	63691	9332	4899	4434	26062	13176	12885	73739	8 819	4 624	4 195	23 598	11 927	11 670	9.8	5.1	4.6	27.4	13.8	13.5	10.2	10.3	10.1	14.5	14.4	14.5	13.6	30670	34.6581	9.48712	938.8	822.3
28	2005-11-04	17	EN	1	49	M	61.9	11.9	178	178.4	61.9	6257	3 052	3 205	17499	8872	8627	52410	7238	3592	3645	20597	10469	10128	59891	6 565	3 215	3 350	18 529	9 388	9 141	7.5	3.8	3.8	21.6	11	10.6	13.6	15	12.1	15	15.3	14.8	12.5	23756	26.8455	7.46421	728.3	658
29	1981-04-21	41	EN	1	21	M	73.2	21	177	177.2	73.7	6948	3 538	3 410	19642	9901	9741	56307	8610	4404	4206	24535	12310	12225	71272	7 342	3 739	3 603	20 723	10 443	10 280	9	4.6	4.4	25.6	12.9	12.8	19.3	19.7	18.9	19.9	19.6	20.3	21	26590	30.0475	8.4682	780.1	685.6
30	2004-09-13	18	EN	1	51	M	67.7	13.5	179.9	180	67.7	7989	3 881	4 108	18865	9604	9261	56930	9162	4444	4717	22097	11238	10859	65808	8 393	4 079	4 315	19 879	10 108	9 771	9.6	4.6	4.9	23.1	11.7	11.4	12.8	12.7	12.9	14.6	14.5	14.7	13.5	26854	30.3462	8.28827	907.1	796
31	2003-11-10	19	EN	1	52	M	73.6	22.5	168.8	168.7	73.6	7371	3 875	3 496	19673	9993	9680	55441	9131	4767	4364	25071	12729	12342	71471	7 783	4 089	3 694	20 730	10 540	10 190	9.5	5	4.6	26.1	13.3	12.9	19.3	18.7	19.9	21.5	21.5	21.6	22.4	27044	30.5609	9.50256	885.1	779.5
32	2005-05-05	17	EN	1	53	M	62.5	9.9	169.6	169.9	62.5	6760	3 404	3 356	17317	8868	8449	53962	7632	3837	3795	19925	10192	9733	60398	7 158	3 606	3 553	18 398	9 419	8 979	8	4	4	21	10.7	10.3	11.4	11.3	11.5	13.1	13	13.2	10.7	24077	27.2082	8.34095	711.8	649.9
33	2005-03-12	17	EN	1	56	M	62.1	11.9	177.4	177.8	62.1	6746	3 398	3 348	17343	9138	8205	52812	7518	3816	3702	20564	10727	9837	59937	7 096	3 577	3 518	18 435	9 701	8 733	7.9	4	3.9	21.7	11.3	10.4	10.3	11	9.6	15.7	14.8	16.6	11.9	24089	27.2218	7.62001	774.4	685.3
34	2003-08-17	19	EN	1	54	M	68	14.3	174.1	174.1	68	7049	3 404	3 645	19867	10039	9828	55687	8222	3968	4254	24154	12242	11913	65692	7 440	3 595	3 845	21 014	10 609	10 406	8.6	4.2	4.5	25.3	12.8	12.5	14.3	14.2	14.3	17.7	18	17.5	15.2	26916	30.4163	8.88	823.6	727.2
35	2006-04-23	16	EN	1	60	M	71.6	13.5	182.3	182	72.6	8117	4 199	3 918	19986	9989	9996	60198	9068	4703	4365	23537	11876	11662	69977	8 588	4 440	4 148	21 201	10 608	10 593	9.5	4.9	4.6	24.8	12.5	12.3	10.5	10.7	10.2	15.1	15.9	14.3	14	28103	31.7576	8.48418	857.3	775.6
36	2000-05-03	22	EN	1	61	M	72.9	15.8	180.2	179.9	72.9	7635	3 892	3 744	20308	10175	10133	58351	9023	4588	4435	24750	12489	12261	69277	8 072	4 112	3 960	21 523	10 776	10 747	9.5	4.8	4.7	26	13.1	12.9	15.4	15.2	15.6	17.9	18.5	17.4	15.8	27943	31.5767	8.63397	796.2	722.1
37	2000-02-05	23	S	1	44	M	82.1	13.6	185.9	184.8	82.1	8248	4 257	3 991	23332	11790	11543	68662	9404	4850	4554	26815	13422	13393	79442	8 667	4 472	4 196	24 682	12 470	12 212	9.8	5.1	4.8	28.2	14.1	14.1	12.3	12.2	12.4	13	12.2	13.8	13.6	31580	35.6865	9.24716	954.7	832.4
38	2001-02-19	21	S	1	45	M	77.4	10.9	179.6	179.1	77.4	8150	4 171	3 979	22090	11040	11050	66853	9166	4694	4472	25363	12743	12620	75028	8 578	4 388	4 190	23 344	11 666	11 679	9.6	4.9	4.7	26.6	13.4	13.2	11.1	11.1	11	12.9	13.4	12.4	10.9	30240	34.1724	9.42737	864	764.2
39	2001-09-29	21	S	1	46	M	73.7	14.3	183.7	184.8	73.2	7119	3 666	3 453	22417	11345	11072	60636	8282	4269	4013	25877	13191	12687	70599	7 575	3 902	3 673	23 998	12 140	11 859	8.7	4.5	4.2	27.5	14	13.5	14	14.1	13.9	13.4	14	12.7	14.1	29536	33.3768	8.64864	800.4	692.7
40	1998-04-17	24	S	1	43	M	70	10.1	178.3	177.8	70.1	7730	4 018	3 712	21480	10780	10700	60602	8635	4472	4163	23811	11842	11970	67391	8 182	4 253	3 929	22 774	11 412	11 361	9.1	4.7	4.4	25.1	12.5	12.6	10.5	10.2	10.8	9.8	9	10.6	10.1	29210	33.0084	9.23992	847.7	742.8
41	1998-10-09	24	S	1	35	M	71.8	10.8	181.7	181.7	71.8	7821	3 940	3 881	22484	11266	11218	61324	8837	4478	4359	25249	12652	12597	68747	8 297	4 181	4 116	23 842	11 942	11 900	9.3	4.7	4.6	26.6	13.3	13.3	11.5	12	11	11	11	10.9	10.8	30305	34.2457	9.17919	895.3	797
42	1999-08-06	23	S	1	50	M	88.5	12.5	182.2	182.5	88.5	10139	5 076	5 062	26954	13458	13496	74134	11396	5773	5623	30549	15414	15134	84751	10 732	5 384	5 348	28 646	14 311	14 335	12	6.1	5.9	32.2	16.3	16	11	12.1	10	11.8	12.7	10.8	12.5	37093	41.9162	11.1369	994.1	836.6
43	2001-09-06	21	S	1	52	M	76.9	15	181.4	181.3	76.9	8007	4 011	3 997	23023	11824	11199	62847	9442	4772	4669	26817	13799	13019	73958	8 501	4 264	4 237	24 370	12 519	11 851	9.9	5	4.9	28.2	14.5	13.7	15.2	16	14.4	14.2	14.3	14	15	31030	35.0651	9.44031	897	756.3
44	2001-09-06	21	S	1	54	M	81.4	18.4	183.4	183.2	81.4	7763	3 881	3 881	24525	12599	11926	63288	9429	4715	4715	29517	15051	14466	77584	8 247	4 123	4 123	25 970	13 328	12 642	9.9	5	5	31	15.8	15.2	17.7	17.7	17.7	16.9	16.3	17.6	18.4	32288	36.4866	9.62034	984.3	880.5
45	2001-05-17	21	S	1	55	M	66.7	13.7	174.1	173.5	66.7	6611	3 344	3 267	19681	10084	9598	55122	7504	3772	3733	22797	11645	11153	64192	6 975	3 522	3 453	20 888	10 692	10 196	7.9	3.9	3.9	24	12.3	11.8	11.9	11.3	12.5	13.7	13.4	13.9	14.1	26292	29.7111	8.73423	905	796.5
46	1999-04-12	23	EN	1	54	M	64.3	14.9	177.3	177.6	64.3	5904	2 955	2 949	19164	9586	9578	52601	6830	3421	3409	22579	11321	11258	61633	6 281	3 140	3 142	20 522	10 270	10 252	7.2	3.6	3.6	23.9	12	11.9	13.6	13.6	13.5	15.1	15.3	14.9	14.7	25068	28.328	7.94756	676.1	603.9
47	2001-04-24	21	EN	1	76	M	71.6	15	181.2	180	71.6	7243	3 552	3 691	19945	9891	10054	57396	8402	4102	4300	24053	11998	12055	67551	7 666	3 758	3 907	21 223	10 535	10 689	8.8	4.3	4.5	25.3	12.6	12.7	13.8	13.4	14.1	17.1	17.6	16.6	15	27188	30.7236	8.39136	744.2	661.3
48	2001-07-12	21	EN	1	70	M	74.4	10.5	180.6	180.8	74.4	7541	4 055	3 487	22325	10914	11411	64079	8537	4599	3939	24842	12298	12544	71683	8 007	4 301	3 706	23 652	11 579	12 073	9	4.8	4.2	26.2	13	13.2	11.7	11.8	11.5	10.1	11.3	9	10.6	29866	33.7497	9.13651	754.5	682.5
49	2001-09-04	21	EN	1	68	M	63.6	12.3	173.5	173.2	63.6	6561	3 191	3 370	18519	9457	9062	53775	7487	3634	3853	20913	10714	10200	61315	6 932	3 379	3 554	19 674	10 045	9 629	7.9	3.8	4	22.1	11.3	10.8	12.4	12.2	12.5	11.4	11.7	11.2	12.3	25080	28.3416	8.36049	715.6	629.3
50	2001-01-08	22	EN	1	77	M	55.2	15.1	164.7	163.6	55.2	5248	2 739	2 510	14977	7442	7535	44882	6291	3267	3025	17511	8632	8879	52883	5 552	2 895	2 658	15 830	7 862	7 968	6.6	3.4	3.2	18.4	9.1	9.3	16.6	16.2	17	14.5	13.8	15.1	15.1	20225	22.8554	7.55652	574.8	516.6
[truncated: 83 more columns]
